# Supplementary material for: p120 catenin induces opposing effects on tumor cell growth depending on E-cadherin expression
Source: PubMed Central journal article supplement — J Cell Biol. 2008 Nov 17;183(4):737–49. doi: 10.1083/jcb.200805113 (PMC2582886; doi:10.1083/jcb.200805113), 2008-11-17
Supplement: jcb.200805113_1.pdf [file jcb.200805113_1.pdf]

Soto et al., <http://www.jcb.org/cgi/content/full/jcb.200805113/DC1>

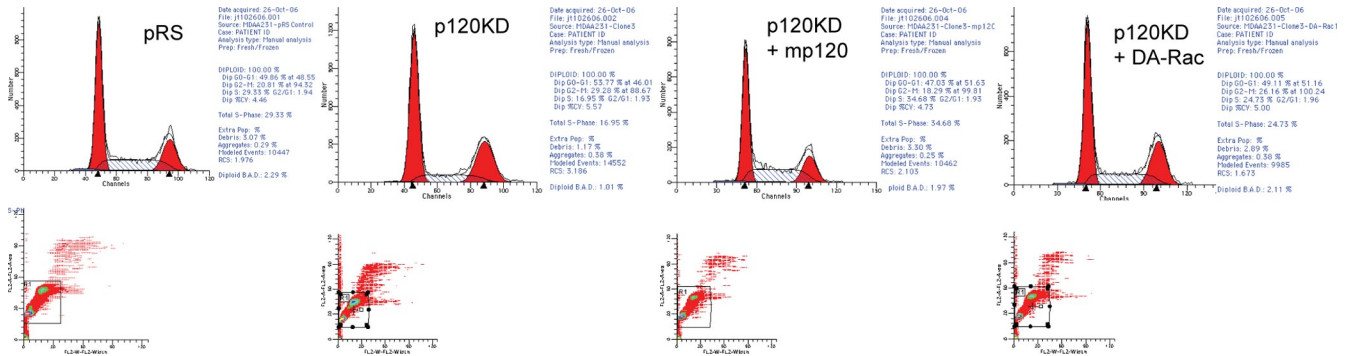

Figure S1. Individual FACS graphs corresponding to data in Figs. 1 D and 2 C.

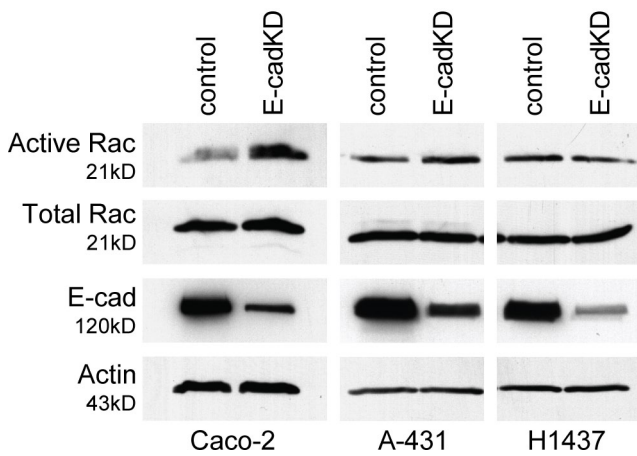

Figure S2. **Effect of E-cadherin depletion on Rac1 activity levels.** Caco-2, A-431, and H1437 cells were transfected with either control or E-cadherin selective RNAi. 2 d after transfection, cells were harvested, and levels of total and active Rac1 were determined in the lysates. E-cadherin depletion increased overall Rac1 activity in Caco-2 and A-431 cells but decreased it in H1437 cells.

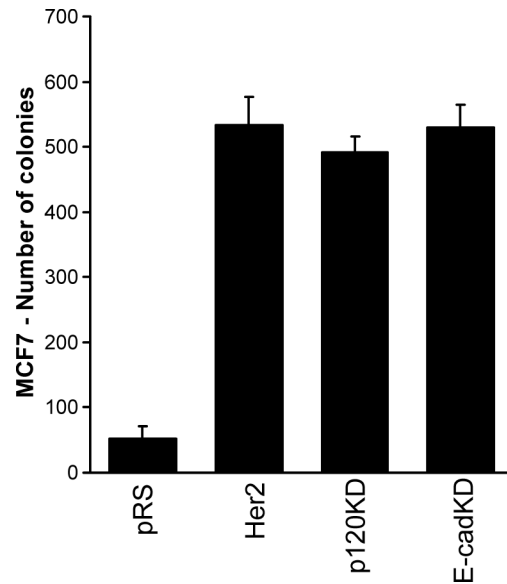

Figure S3. **Effect of E-cadherin depletion or Her2 on MCF7 soft agar growth.** The soft agar growth of MCF7 cells stably overexpressing Her2 was compared with that of control MCF7 cells (pRS) as well as cells stably expressing p120 or E-cadherin-specific shRNA. The growth of p120 or E-cadherin-depleted cells is comparable with cells overexpressing Her2 ( $n = 6$ ). Mean  $\pm$  SEM (error bars;  $n = 9$ ).
